# Supplementary material for: Comparative cytomolecular analyses reveal karyotype variability related to biogeographic and species richness patterns in Bombacoideae (Malvaceae)
Source: Springer Nature journal article supplement (doi:10.1007/s00606-017-1427-6), 2017-06-21
Supplement: 606_2017_1427_MOESM3_ESM.pdf [file 606_2017_1427_MOESM3_ESM.pdf]

**Comparative cytomolecular analyses reveal karyotype variability related to biogeographic and species richness patterns in Bombacoideae (Malvaceae)**

*Plant Systematics and Evolution*

**Lucas Costa<sup>1\*</sup> · Álex Oliveira<sup>1\*</sup> · Jefferson Carvalho-Sobrinho<sup>2</sup> · Gustavo Souza<sup>1</sup>**

<sup>1</sup> Laboratory of Plant Cytogenetics and Evolution, Department of Botany, Federal University of Pernambuco, 50670-420, Recife, Brazil

<sup>2</sup> Colegiado de Ciências Biológicas, Universidade Federal do Vale do São Francisco, BR-407, Km 12, Vila CS-01, Petrolina, PE, 56300-990, Brazil.

\* These authors contributed equally to this work.

✉ Gustavo Souza

lgrsouza@hotmail.com

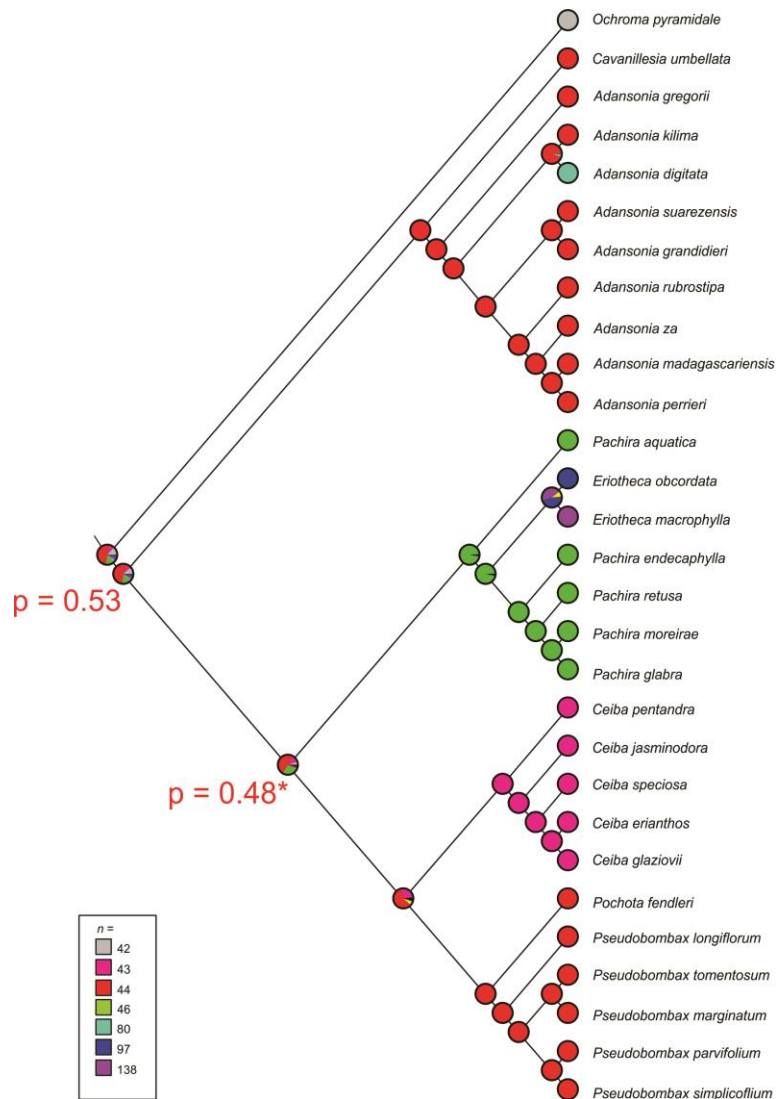

**Online Resource 3** – Ancestral character reconstruction of chromosome number reconstruction for Bombacoideae as shown on an ultrametric tree based on Carvalho-Sobrinho et al. (2016) rooted on *Ochroma pyramidale*. Ancestral state reconstruction were performed using ML optimization as implemented in Mesquite. Pie charts represent the probabilities of inferred chromosome numbers. \* = highest probability of ancestral chromosome number for the Kapok clade.
